# Supplementary material for: A Structural Potential of Rare Trinucleotide Repeat Tracts in RNA
Source: MDPI journal article supplement (doi:10.3390/ijms23105850), 2022-05-23
Supplement: s1 [file s1]

**A**

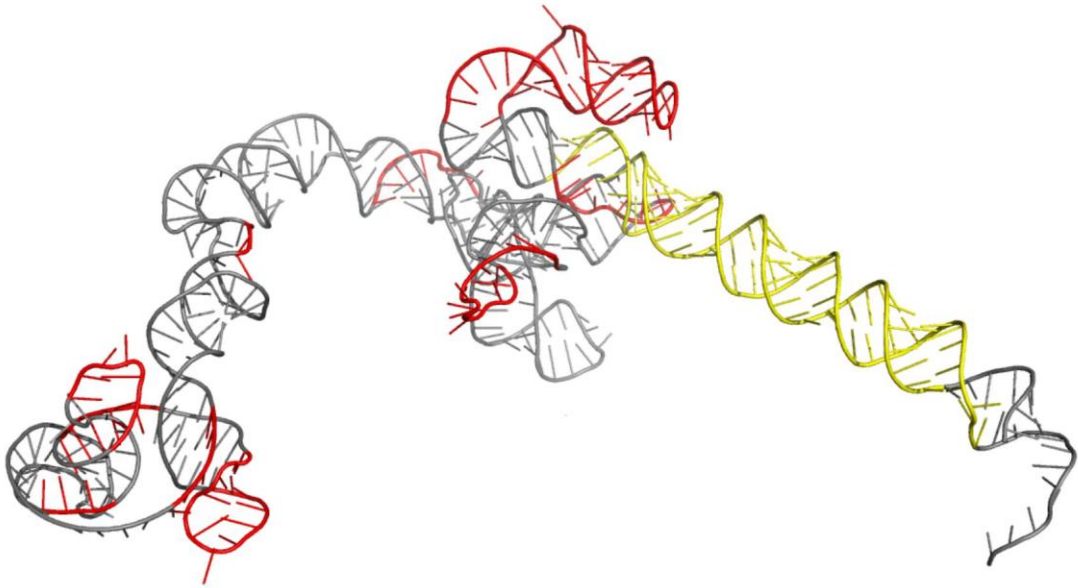

**B**

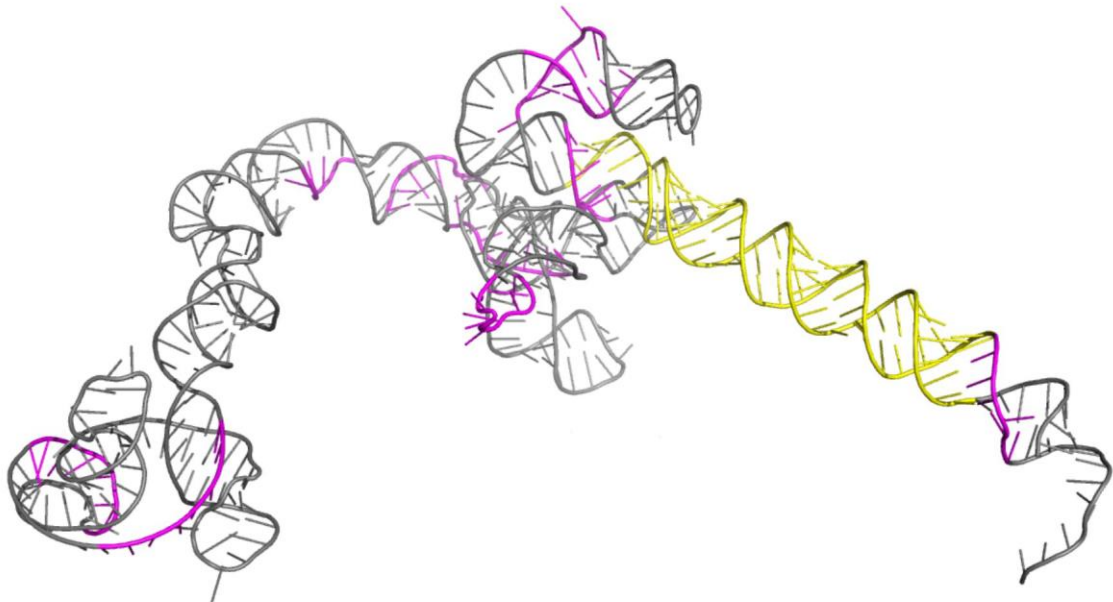

**Figure S2.** GABRA4 3D structure with reactive (red) sites in the chemical mapping (A) and miRNA target sites (magenta) prediction (B). AAU-GUU repeats are marked yellow.
