# Supplementary material for: A Structural Potential of Rare Trinucleotide Repeat Tracts in RNA
Source: MDPI journal article supplement (doi:10.3390/ijms23105850), 2022-05-23
Supplement: s1 [file s1]

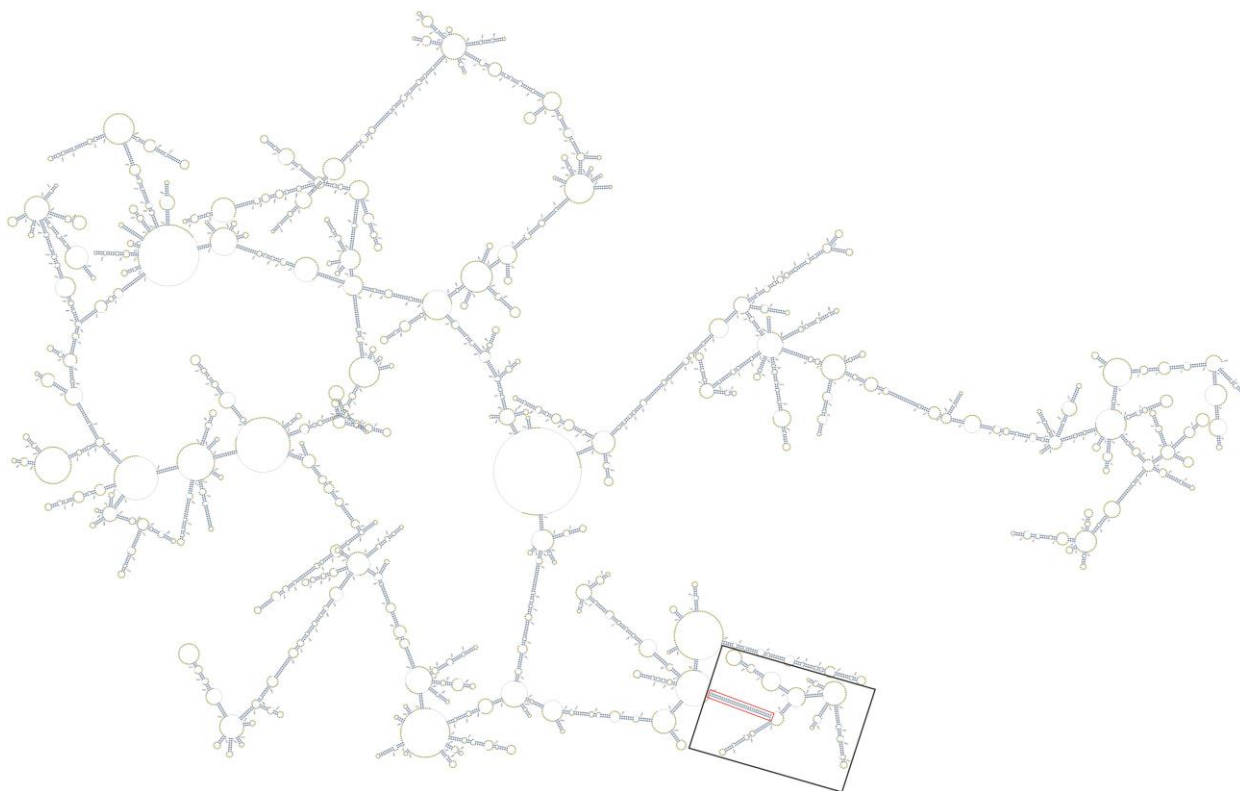

**Figure S1.** In silico secondary structure of GABRA4 whole 3'UTR (RNAFold). Analyzed region is marked in black frame, interacting repeat tracts are marked in red frame.
