# Supplementary material for: A Structural Potential of Rare Trinucleotide Repeat Tracts in RNA
Source: MDPI journal article supplement (doi:10.3390/ijms23105850), 2022-05-23
Supplement: s1 [file s1]

| Target Rank | Target Score | miRNA Name        | Sequence (bold=seed)          | Gene Symbol | Seed Location within target                                                                                      | site (3'UTR/analyzed domain) | miR-Expression                   | TSI       | evidence             |
|-------------|--------------|-------------------|-------------------------------|-------------|------------------------------------------------------------------------------------------------------------------|------------------------------|----------------------------------|-----------|----------------------|
| 6           | 100          | hsa-miR-126-5p    | <b>CAUUAUUACUUUGGUACGCG</b>   | GABRA4      | 2455, 2467, 2470, 2473, 2476, 2479, 2482, 2485, 2488, 2491, 2494, 2497, 2500, 2503, 2701, 2703, 4015, 4474, 4856 | AAU repeats                  | spleen, thyroid                  | 0,6-0,84  | experimental, cloned |
| 4           | 100          | hsa-miR-4795-3p   | <b>AUAUUUUAGCCACUUCUGGAU</b>  | GABRA4      | 2454, 2466, 2468, 2471, 2474, 2477, 2480, 2483, 2486, 2489, 2492, 2495, 2498, 2501, 2504, 2701, 4016, 4474, 4856 | AAU repeats                  | no data (TA)                     | -         | experimental         |
| 2           | 100          | hsa-miR-5692a     | <b>CAAAUAUACCACAGUGGUGU</b>   | GABRA4      | 195, 693, 869, 1961, 2204, 2432, 2571, 7936, 8908                                                                | 2204/94, 2432/322            | brain                            | 0,33-0,48 | experimental         |
| 11          | 99           | hsa-miR-607       | <b>GUUCAAAUCCAGAUUAUAAAC</b>  | GABRA4      | 307, 2383, 3063, 6261, 7291, 8384, 8932                                                                          | 2383/273                     | no data (TA)                     |           | experimental         |
| 20          | 98           | hsa-miR-6507-5p   | <b>GAAGAAUAGGAGGACUUUGU</b>   | GABRA4      | 78, 2369, 3596, 3618, 4314, 5391, 8689                                                                           | 2369/259                     | stomach, testis, kidney          | 0,62-0,88 | experimental         |
| 28          | 97           | hsa-miR-3671      | <b>AUCAAAUAAGGACUAGUCUGCA</b> | GABRA4      | 306, 2383, 7290                                                                                                  | 2383/273                     | no data (TA)                     |           | experimental         |
| 50          | 93           | hsa-miR-3171      | <b>AGAUGUAUGGAUCUGUAUAUAL</b> | GABRA4      | 2323, 2601, 7728                                                                                                 | 2323/213                     | muscle, bone, adipocyte, brain   | 0,74-0,76 | experimental         |
| 56          | 92           | hsa-miR-205-5p    | <b>UCCUUCAUUCCACCGAGUCUG</b>  | GABRA4      | 859, 2309, 4113, 4421, 8425                                                                                      | 2309/199                     | skin                             | 0,94-1    | experimental, cloned |
| 80          | 86           | hsa-miR-33a-3p    | <b>CAUGUUUCCACAGUGCAUAC</b>   | GABRA4      | 478, 2412, 9257                                                                                                  | 2412/302                     | no data (TA)                     | -         | experimental, cloned |
| 87          | 85           | hsa-miR-5007-3p   | <b>AUCAUAUGAACCAACUCUAU</b>   | GABRA4      | 2306, 7674, 8533                                                                                                 | 2306/196                     | no data (TA)                     | -         | not experimental     |
| 89          | 84           | hsa-miR-196a-1-3p | <b>CAACAACAUUAAACACCCGA</b>   | GABRA4      | 2120, 2123, 2126, 2129, 2132, 2135, 2138, 2141, 2144, 2511, 7899                                                 | GUU repeats                  | no data (TA)                     | -         | not experimental     |
| 97          | 84           | hsa-miR-5571-5p   | <b>CAAUUCUCAAAGGAGCCUCCC</b>  | GABRA4      | 1458, 2355, 7275, 9116                                                                                           | 2355/245                     | testis, gallbladder, bone marrow | 0,37-0,5  | experimental         |
| 142         | 81           | hsa-miR-3529-3p   | <b>AACAACAAAUCACUAGUCUCCA</b> | GABRA4      | 2119, 2122, 2125, 2128, 2131, 2134, 2137, 2140, 2143, 8515                                                       | GUU repeats                  | no data (TA)                     | -         | not experimental     |
| 139         | 81           | hsa-miR-676-5p    | <b>UCUUCACCCUAGGACUUGCA</b>   | GABRA4      | 1221, 2385, 4111, 4468                                                                                           | 2385/275                     | no data (TA)                     |           | experimental         |

**Figure S3.** miRDB top search results found for *GABRA4* 3'UTR region. TA – according to miRNA Tissue Atlas [56].
